# Supplementary material
Source: PubMed Central journal article supplement (PMC4610859)
Supplement: NIHMS719683-supplement-1.pdf [file NIHMS719683-supplement-1.pdf]

Supplemental Figures and Tables

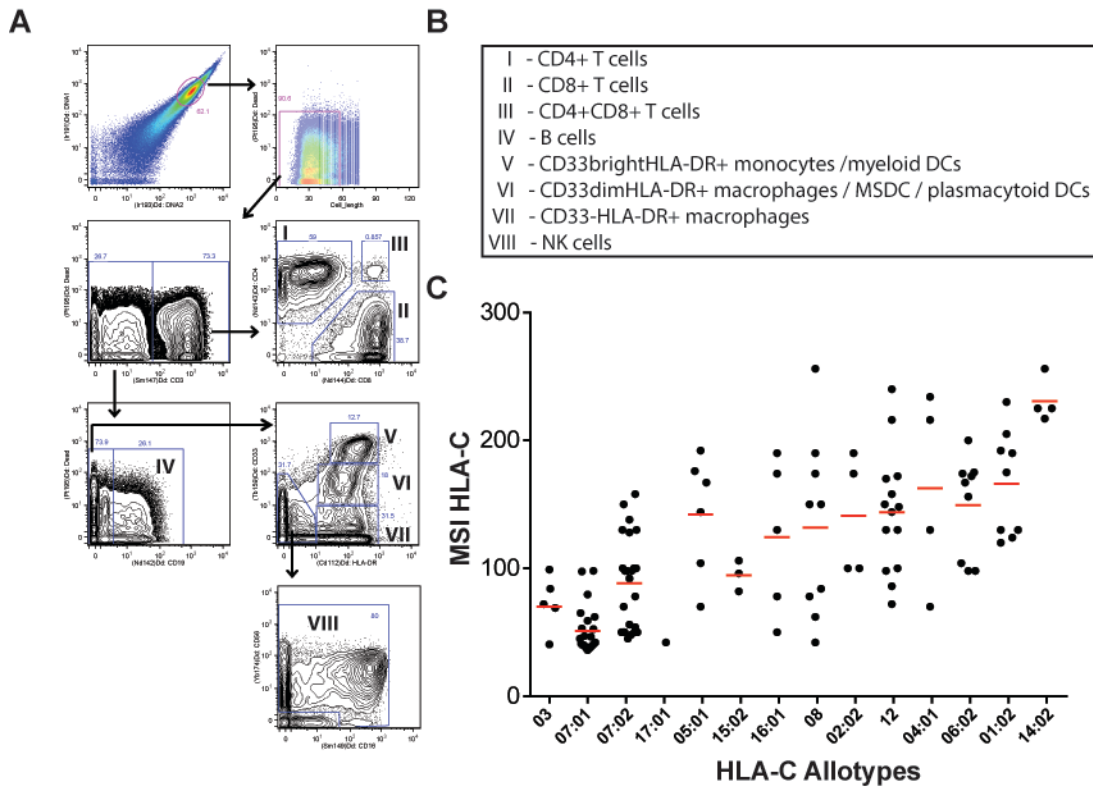

Fig. S1. Gating strategy for major cell lineages in PBMC. (A) Representative 2D CyTOF plots demonstrating gating strategy for defining major leukocyte populations in PBMC. Roman numerals correspond to (B) description of gated subset populations. (C) Cell-surface density (MSI) of HLA-C on unfractionated PBMC in healthy CMV-negative controls across different HLA-C allotypes. Each individual is plotted two times, one for each HLA-C allele. Red bars represent mean values.

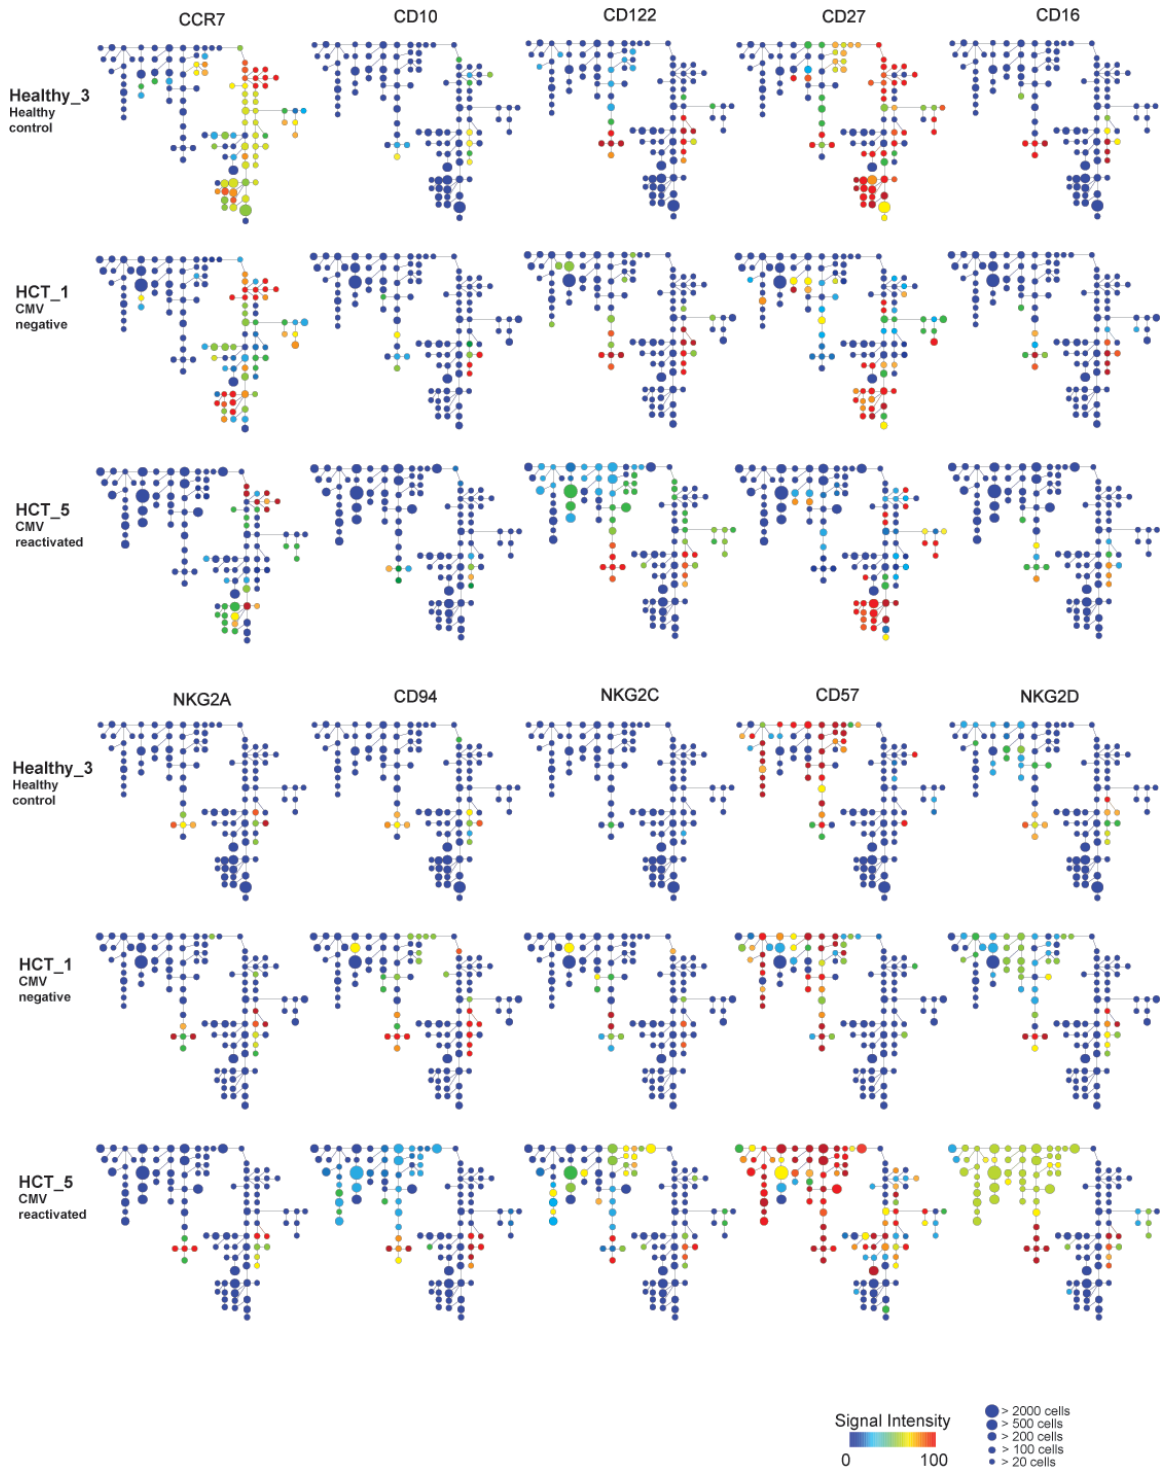

Fig. S2. SPADE analysis evaluating expression of NK cell receptors on T cells. SPADE clustering analysis for the same 3 representative samples used in Figs. 5 and 6 (Control, CMV-negative and CMV-reactivated) for evaluating distribution of NK cell receptors expressed across CD4, CD8 and CD4CD8 T cells. Node color represents signal intensity and size represents frequency.

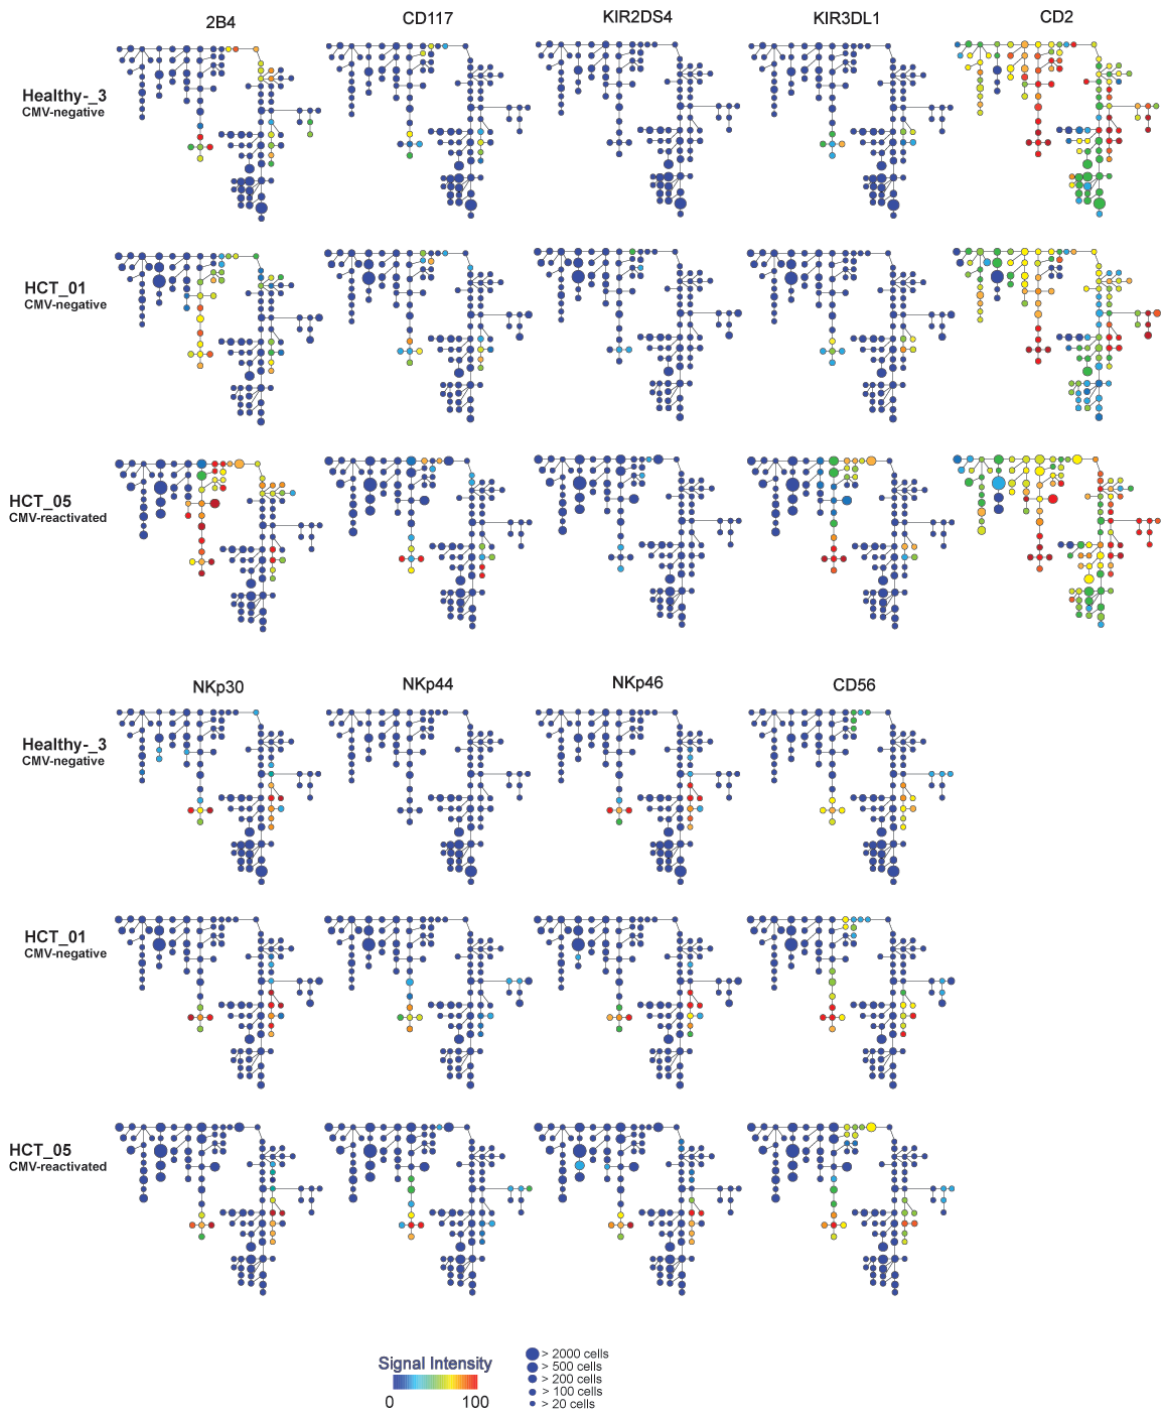

Fig. S3. Continuation of SPADE analysis evaluating expression of NK cell receptors on T cells. SPADE clustering analysis for the same 3 representative samples used in Figs. 5 and 6 (Control, CMV-negative and CMV-reactivated) for evaluating distribution of NK cell receptors expressed across CD4, CD8 and CD4CD8 T cells. Node color represents signal intensity and size represents frequency.

Table S1. Mass cytometry antibody panel

| Isotope      | Isotope Source | Antibody      | Antibody Clone | Antibody Source  |
|--------------|----------------|---------------|----------------|------------------|
| 112 Cd/Q-dot | DVS Sciences   | HLA-DR        | Tu36           | Invitrogen       |
| 115In        | Sigma Aldrich  | CD57          | HCD57          | BioLegend        |
| 139La        | DVS Sciences   | CD2           | RPA-2.10       | BioLegend        |
| 141Pr        | DVS Sciences   | KIR2DS4       | FES172         | Beckman Coulter  |
| 142Nd        | DVS Sciences   | CD27          | O323           | BioLegend        |
| 143Nd        | DVS Sciences   | CD19          | SJ25-C1        | Southern Biotech |
| 144Nd        | DVS Sciences   | CD122         | TU27           | BioLegend        |
| 145Nd        | DVS Sciences   | CD4           | RPA-T4         | DVS Sciences     |
| 146Nd        | DVS Sciences   | CD8           | RPA-T8         | DVS Sciences     |
| 147Sm        | DVS Sciences   | CD3           | UCHT-1         | BioLegend        |
| 147Sm        | DVS Sciences   | MIP-1 $\beta$ | D21.1351       | BD Pharmingen    |
| 148Nd        | DVS Sciences   | CD16          | 3G8            | DVS Sciences     |
| 149Sm        | DVS Sciences   | KIR2DL2/L3/S2 | GL183          | Beckman Coulter  |
| 150Nd        | DVS Sciences   | CD10          | HI10a          | BioLegend        |
| 151Eu        | DVS Sciences   | KIR3DL1/S1    | Z27.3.7        | Beckman Coulter  |
| 154Sm        | DVS Sciences   | LILRB1        | HP-F1          | Beckman Coulter  |
| 155Gd        | Trace Sciences | NKp46         | 9E2            | BioLegend        |
| 156Gd        | DVS Sciences   | NKG2D         | 1D11           | BioLegend        |
| 157Gd        | Trace Sciences | NKG2C         | 134522         | R&D Systems      |
| 158Gd        | DVS Sciences   | 2B4           | C1.7           | BioLegend        |
| 159Tb        | DVS Sciences   | CD33          | WM53           | BioLegend        |
| 160Gd        | DVS Sciences   | NKp44         | P44-8          | BioLegend        |
| 161Dy        | Trace Sciences | NKp30         | P30-15         | BioLegend        |
| 162Dy        | DVS Sciences   | CD69          | FN30           | DVS Sciences     |
| 163Dy        | Trace Sciences | KIR3DL1       | DX9            | BioLegend        |
| 164Dy        | DVS Sciences   | CD161         | HP-3G10        | DVS Sciences     |
| 165Ho        | DVS Sciences   | HLA-E         | 3D12           | BioLegend        |
| 166Er        | DVS Sciences   | KIR2DL1       | 143211         | R&D Systems      |
| 167Er        | DVS Sciences   | CD94          | DX22           | BioLegend        |
| 168Er        | DVS Sciences   | KIR2DL1/S1    | EB6.B          | Beckman Coulter  |
| 169Tm        | DVS Sciences   | CCR7          | G043H7         | BioLegend        |
| 169Tm        | DVS Sciences   | CD107a        | H4A3           | BioLegend        |
| 170Er        | DVS Sciences   | KIR2DL3       | 180701         | R&D Systems      |
| 171Yb        | DVS Sciences   | NKG2A         | Z199           | Beckman Coulter  |
| 172Yb        | DVS Sciences   | KIR3DL2       | DX31           | L. Lanier        |
| 173Yb        | Trace Sciences | KIR2DL4       | mAb 33         | BioLegend        |
| 174Yb        | DVS Sciences   | CD56          | HCD-56         | BioLegend        |
| 175Lu        | DVS Sciences   | KIR2DL5       | UP-R1          | BioLegend        |
| 175Lu        | DVS Sciences   | IFN- $\gamma$ | 4S.B3          | eBioscience      |
| 176Yb        | DVS Sciences   | HLA-C         | DT9            | V. Braud         |
